# Supplementary material
Source: publisher site journal article supplement (https://cdn.jamanetwork.com/ama/content_public/journal/psych/937475/yoi180039supp1_prod.pdf)
Supplement: Supplementary file 1 [file yoi180039supp1_prod.pdf]

## Supplementary Online Content

Yesavage JA, Fairchild JK, Mi Z, et al; for the VA Cooperative Studies Program Study Team. Effect of repetitive transcranial magnetic stimulation on treatment-resistant major depression in US veterans: a randomized clinical trial. *JAMA Psychiatry*. Published online June 27, 2018. doi:10.1001/jamapsychiatry.2018.1483

**eTable 1.** Adequacy of Antipsychotic and Antidepressant Trial by Treatment Group before Randomization

**eTable 2.** Adequacy of Antipsychotic and Antidepressant Trial by Treatment Group at End of Active Treatment

**eTable 3.** Urine Drug Screen Results

**eTable 4.** Effect of rTMS Treatment on Secondary Outcomes (Intention to Treat)

**eTable 5.** Effect of rTMS Treatment by Gender

**eTable 6.** Effect of rTMS Treatment on Secondary Outcomes (Intention to Treat) by PTSD Status, End of rTMS Treatment

**eTable 7.** Effect of rTMS Treatment on Secondary Outcomes (Intention to Treat) by PTSD Status, End of 24-Week Follow-Up

This supplementary material has been provided by the authors to give readers additional information about their work.

**eTable 1: Adequacy of Antipsychotic and Antidepressant Trial by Treatment Group Before Randomization**

| <b>Level 3 and Level 4 ATHF Codes</b>                                                   | <b>Active</b> |              |               | <b>Sham</b>   |              |               | <b>All</b>     |            |               |                |
|-----------------------------------------------------------------------------------------|---------------|--------------|---------------|---------------|--------------|---------------|----------------|------------|---------------|----------------|
| <b>(Indicates moderate to strong confidence that an adequate trial has taken place)</b> | <b>(n=81)</b> |              |               | <b>(n=83)</b> |              |               | <b>(n=164)</b> |            |               |                |
|                                                                                         | <b>n</b>      | <b>( % )</b> | <b>Events</b> | <b>n</b>      | <b>( % )</b> | <b>Events</b> | <b>n</b>       | <b>(%)</b> | <b>Events</b> | <b>P Value</b> |
| <b>Antidepressants</b>                                                                  | 10            | 12.3         | 13            | 10            | 12.0         | 11            | 20             | 12.2       | 24            | 0.95           |
| <b>Other antidepressants</b>                                                            | 7             | 8.6          | 9             | 7             | 8.4          | 8             | 14             | 8.5        | 17            | 0.96           |
| <b>Selective serotonin reuptake inhibitors</b>                                          | 4             | 4.9          | 4             | 2             | 2.4          | 2             | 6              | 3.7        | 6             | 0.39           |
| <b>Non-selective monoamine reuptake inhibitors</b>                                      | 0             | 0.0          | 0             | 1             | 1.2          | 1             | 1              | 0.6        | 1             | 0.32           |
| <b>Antipsychotics</b>                                                                   | 3             | 3.7          | 3             | 3             | 3.6          | 3             | 6              | 3.7        | 6             | 0.98           |
| <b>Diazepines, Oxazepines, Thiazepines, and Oxepines</b>                                | 2             | 2.5          | 2             | 1             | 1.2          | 1             | 3              | 1.8        | 3             | 0.55           |
| <b>Other Antipsychotics</b>                                                             | 1             | 1.2          | 1             | 2             | 2.4          | 2             | 3              | 1.8        | 3             | 0.57           |

Note. ATHF: Antidepressant Treatment History Form

**eTable 2: Adequacy of Antipsychotic and Antidepressant Trial by Treatment Group at End of Active Treatment**

| <b>Level 3 and Level 4 ATHF Codes</b>                                                   | <b>Active</b> |              |               | <b>Sham</b>   |              |               | <b>All</b>     |            |               |                |
|-----------------------------------------------------------------------------------------|---------------|--------------|---------------|---------------|--------------|---------------|----------------|------------|---------------|----------------|
| <b>(Indicates moderate to strong confidence that an adequate trial has taken place)</b> | <b>(n=81)</b> |              |               | <b>(n=83)</b> |              |               | <b>(n=164)</b> |            |               |                |
|                                                                                         | <b>n</b>      | <b>( % )</b> | <b>Events</b> | <b>n</b>      | <b>( % )</b> | <b>Events</b> | <b>n</b>       | <b>(%)</b> | <b>Events</b> | <b>P Value</b> |
| <b>Antidepressants</b>                                                                  | 22            | 27.2         | 44            | 29            | 34.9         | 52            | 51             | 31.1       | 96            | 0.28           |
| <b>Other antidepressants</b>                                                            | 19            | 23.5         | 38            | 17            | 20.5         | 27            | 36             | 22.0       | 65            | 0.65           |
| <b>Selective serotonin reuptake inhibitors</b>                                          | 6             | 7.4          | 6             | 17            | 20.5         | 22            | 23             | 14.0       | 28            | 0.02           |
| <b>Non-selective monoamine reuptake inhibitors</b>                                      | 0             | 0.0          | 0             | 3             | 3.6          | 3             | 3              | 1.8        | 3             | 0.08           |
| <b>Antipsychotics</b>                                                                   | 6             | 7.4          | 6             | 12            | 14.5         | 27            | 18             | 11.0       | 33            | 0.15           |
| <b>Diazepines, oxazepines, thiazepines, and oxepines</b>                                | 4             | 4.9          | 4             | 5             | 6.0          | 8             | 9              | 5.5        | 12            | 0.76           |
| <b>Other antipsychotics</b>                                                             | 2             | 2.5          | 2             | 2             | 2.4          | 9             | 4              | 2.4        | 11            | 0.98           |
| <b>Indole derivatives</b>                                                               | 0             | 0.0          | 0             | 3             | 3.6          | 6             | 3              | 1.8        | 6             | 0.08           |
| <b>Lithium</b>                                                                          | 0             | 0.0          | 0             | 3             | 3.6          | 4             | 3              | 1.8        | 4             | 0.08           |

Note. ATHF: Antidepressant Treatment History Form

**eTable 3: Urine Drug Screen Results**

| Drug         | Result     | -----Baseline-----     |                      |                        |         | -----End of rTMS Treatment----- |                      |                        |         | -----End of 24-week Follow-up----- |                      |                        |         |
|--------------|------------|------------------------|----------------------|------------------------|---------|---------------------------------|----------------------|------------------------|---------|------------------------------------|----------------------|------------------------|---------|
|              |            | Active (n=81)<br>n (%) | Sham (n=83)<br>n (%) | Total (n=164)<br>n (%) | P Value | Active (n=81)<br>n (%)          | Sham (n=83)<br>n (%) | Total (n=164)<br>n (%) | P Value | Active (n=81)<br>n (%)             | Sham (n=83)<br>n (%) | Total (n=164)<br>n (%) | P Value |
| <b>MET +</b> | <b>Neg</b> | 78 (100.0)             | 74 (100.0)           | 152 (100.0)            | N/A     | 56 (100.0)                      | 61 (100.0)           | 117 (100.0)            | N/A     | 39 (100.0)                         | 47 (100.0)           | 86 (100.0)             | N/A     |
| <b>ECS</b>   | <b>Pos</b> | 0 (0.0)                | 0 (0.0)              | 0 (0.0)                |         | 0 (0.0)                         | 0 (0.0)              | 0 (0.0)                |         | 0 (0.0)                            | 0 (0.0)              | 0 (0.0)                |         |
|              | <b>Tot</b> | 78 (51.3)              | 74 (48.7)            | 152 (100.0)            |         | 56 (47.9)                       | 61 (52.1)            | 117 (100.0)            |         | 39 (45.3)                          | 47 (54.7)            | 86 (100.0)             |         |
| <b>AMP +</b> | <b>Neg</b> | 81 (100.0)             | 81 (97.6)            | 162 (98.8)             | 0.16    | 59 (100.0)                      | 67 (98.5)            | 126 (99.2)             | 0.35    | 42 (100.0)                         | 47 (95.9)            | 89 (97.8)              | 0.19    |
| <b>MDA</b>   | <b>Pos</b> | 0 (0.0)                | 2 (2.4)              | 2 (1.2)                |         | 0 (0.0)                         | 1 (1.5)              | 1 (0.8)                |         | 0 (0.0)                            | 2 (4.1)              | 2 (2.2)                |         |
|              | <b>Tot</b> | 81 (49.4)              | 83 (50.6)            | 164 (100.0)            |         | 59 (46.5)                       | 68 (53.5)            | 127 (100.0)            |         | 42 (46.2)                          | 49 (53.8)            | 91 (100.0)             |         |
| <b>THC</b>   | <b>Neg</b> | 81 (100.0)             | 81 (97.6)            | 162 (98.8)             | 0.16    | 59 (100.0)                      | 66 (97.1)            | 125 (98.4)             | 0.18    | 40 (95.2)                          | 48 (98.0)            | 88 (96.7)              | 0.47    |
|              | <b>Pos</b> | 0 (0.0)                | 2 (2.4)              | 2 (1.2)                |         | 0 (0.0)                         | 2 (2.9)              | 2 (1.6)                |         | 2 (4.8)                            | 1 (2.0)              | 3 (3.3)                |         |
|              | <b>Tot</b> | 81 (49.4)              | 83 (50.6)            | 164 (100.0)            |         | 59 (46.5)                       | 68 (53.5)            | 127 (100.0)            |         | 42 (46.2)                          | 49 (53.8)            | 91 (100.0)             |         |
| <b>COC</b>   | <b>Neg</b> | 81 (100.0)             | 83 (100.0)           | 164 (100.0)            | N/A     | 59 (100.0)                      | 68 (100.0)           | 127 (100.0)            | N/A     | 42 (100.0)                         | 49 (100.0)           | 91 (100.0)             | N/A     |
|              | <b>Pos</b> | 0 (0.0)                | 0 (0.0)              | 0 (0.0)                |         | 0 (0.0)                         | 0 (0.0)              | 0 (0.0)                |         | 0 (0.0)                            | 0 (0.0)              | 0 (0.0)                |         |
|              | <b>Tot</b> | 81 (49.4)              | 83 (50.6)            | 164 (100.0)            |         | 59 (46.5)                       | 68 (53.5)            | 127 (100.0)            |         | 42 (46.2)                          | 49 (53.8)            | 91 (100.0)             |         |
| <b>OPI</b>   | <b>Neg</b> | 72 (88.9)              | 77 (92.8)            | 149 (90.9)             | 0.39    | 56 (94.9)                       | 63 (92.6)            | 119 (93.7)             | 0.60    | 40 (95.2)                          | 44 (89.8)            | 84 (92.3)              | 0.33    |
|              | <b>Pos</b> | 9 (11.1)               | 6 (7.2)              | 15 (9.1)               |         | 3 (5.1)                         | 5 (7.4)              | 8 (6.3)                |         | 2 (4.8)                            | 5 (10.2)             | 7 (7.7)                |         |
|              | <b>Tot</b> | 81 (49.4)              | 83 (50.6)            | 164                    |         | 59 (46.5)                       | 68                   | 127                    |         | 42 (46.2)                          | 49                   | 91 (100.0)             |         |

|                  |            |               |               |                |      |            |               |                |      |            |               |            |      |
|------------------|------------|---------------|---------------|----------------|------|------------|---------------|----------------|------|------------|---------------|------------|------|
|                  |            |               |               | (100.0)        |      |            | (53.5)        | (100.0)        |      |            | (53.8)        |            |      |
| <b>BAR</b>       | <b>Neg</b> | 79<br>(100.0) | 72<br>(100.0) | 151<br>(100.0) | N/A  | 56 (98.2)  | 60<br>(100.0) | 116<br>(99.1)  | 0.30 | 40 (100.0) | 46<br>(100.0) | 86 (100.0) | N/A  |
|                  | <b>Pos</b> | 0 (0.0)       | 0 (0.0)       | 0 (0.0)        |      | 1 (1.8)    | 0 (0.0)       | 1 (0.9)        |      | 0 (0.0)    | 0 (0.0)       | 0 (0.0)    |      |
|                  | <b>Tot</b> | 79 (52.3)     | 72 (47.7)     | 151<br>(100.0) |      | 57 (48.7)  | 60<br>(51.3)  | 117<br>(100.0) |      | 40 (46.5)  | 46<br>(53.5)  | 86 (100.0) |      |
| <b>BZD</b>       | <b>Neg</b> | 72 (88.9)     | 73 (89.0)     | 145 (89.0)     | 0.98 | 52 (89.7)  | 61<br>(89.7)  | 113<br>(89.7)  | 0.99 | 38 (90.5)  | 45<br>(93.8)  | 83 (92.2)  | 0.56 |
|                  | <b>Pos</b> | 9 (11.1)      | 9 (11.0)      | 18 (11.0)      |      | 6 (10.3)   | 7 (10.3)      | 13 (10.3)      |      | 4 (9.5)    | 3 (6.3)       | 7 (7.8)    |      |
|                  | <b>Tot</b> | 81 (49.7)     | 82 (50.3)     | 163<br>(100.0) |      | 58 (46.0)  | 68<br>(54.0)  | 126<br>(100.0) |      | 42 (46.7)  | 48<br>(53.3)  | 90 (100.0) |      |
| <b>PCP</b>       | <b>Neg</b> | 75 (96.2)     | 71 (98.6)     | 146 (97.3)     | 0.35 | 55 (98.2)  | 60<br>(100.0) | 115<br>(99.1)  | 0.30 | 37 (94.9)  | 46<br>(100.0) | 83 (97.6)  | 0.12 |
|                  | <b>Pos</b> | 3 (3.8)       | 1 (1.4)       | 4 (2.7)        |      | 1 (1.8)    | 0 (0.0)       | 1 (0.9)        |      | 2 (5.1)    | 0 (0.0)       | 2 (2.4)    |      |
|                  | <b>Tot</b> | 78 (52.0)     | 72 (48.0)     | 150<br>(100.0) |      | 56 (48.3)  | 60<br>(51.7)  | 116<br>(100.0) |      | 39 (45.9)  | 46<br>(54.1)  | 85 (100.0) |      |
| <b>MTD</b>       | <b>Neg</b> | 77 (97.5)     | 71 (98.6)     | 148 (98.0)     | 0.62 | 55 (98.2)  | 59<br>(98.3)  | 114<br>(98.3)  | 0.96 | 39 (97.5)  | 45<br>(97.8)  | 84 (97.7)  | 0.92 |
|                  | <b>Pos</b> | 2 (2.5)       | 1 (1.4)       | 3 (2.0)        |      | 1 (1.8)    | 1 (1.7)       | 2 (1.7)        |      | 1 (2.5)    | 1 (2.2)       | 2 (2.3)    |      |
|                  | <b>Tot</b> | 79 (52.3)     | 72 (47.7)     | 151<br>(100.0) |      | 56 (48.3)  | 60<br>(51.7)  | 116<br>(100.0) |      | 40 (46.5)  | 46<br>(53.5)  | 86 (100.0) |      |
| <b>OXY</b>       | <b>Neg</b> | 76 (96.2)     | 71 (98.6)     | 147 (97.4)     | 0.36 | 56 (100.0) | 58<br>(96.7)  | 114<br>(98.3)  | 0.17 | 39 (97.5)  | 44<br>(95.7)  | 83 (96.5)  | 0.64 |
|                  | <b>Pos</b> | 3 (3.8)       | 1 (1.4)       | 4 (2.6)        |      | 0 (0.0)    | 2 (3.3)       | 2 (1.7)        |      | 1 (2.5)    | 2 (4.3)       | 3 (3.5)    |      |
|                  | <b>Tot</b> | 79 (52.3)     | 72 (47.7)     | 151<br>(100.0) |      | 56 (48.3)  | 60<br>(51.7)  | 116<br>(100.0) |      | 40 (46.5)  | 46<br>(53.5)  | 86 (100.0) |      |
| <b>ETO<br/>H</b> | <b>Neg</b> | 81<br>(100.0) | 83<br>(100.0) | 164<br>(100.0) | N/A  | 59 (100.0) | 68<br>(100.0) | 127<br>(100.0) | N/A  | 42 (100.0) | 49<br>(100.0) | 91 (100.0) | N/A  |
|                  | <b>Pos</b> | 0 (0.0)       | 0 (0.0)       | 0 (0.0)        |      | 0 (0.0)    | 0 (0.0)       | 0 (0.0)        |      | 0 (0.0)    | 0 (0.0)       | 0 (0.0)    |      |
|                  | <b>Tot</b> | 81 (49.4)     | 83 (50.6)     | 164<br>(100.0) |      | 59 (46.5)  | 68<br>(53.5)  | 127<br>(100.0) |      | 42 (46.2)  | 49<br>(53.8)  | 91 (100.0) |      |

Note.

Neg: Negative  
Pos: Positive  
Tot: Total  
MET: Methamphetamine (MET)  
ECS: Ecstasy (ECS)  
AMP: Amphetamine (AMP)  
MDA: Methylenedioxyamphetamine (MDA)  
THC: Marijuana (THC)  
COC: Cocaine (COC)  
OPI: Opiates (OPI)  
BAR: Barbiturates (BAR)  
BZD: Benzodiazepines (BZD)  
PCP: Phencyclidine (PCP)  
MTD: Methadone (MTD)  
OXY: Oxycodone (OXY)  
ETOH: Alcohol

**eTable 4: Effect of rTMS Treatment on Secondary Outcomes (Intention to Treat)**

| Outcome           | Results             | ----End of rTMS Treatment---- |             |         | ----End of 24-week Follow-up---- |             |         |
|-------------------|---------------------|-------------------------------|-------------|---------|----------------------------------|-------------|---------|
|                   |                     | Active (n=81)                 | Sham (n=83) | P Value | Active (n=81)                    | Sham (n=83) | P Value |
| <b>HRSD17 ≤ 7</b> | <b>Not Remitted</b> | 57 (70.4)                     | 59 (71.1)   | 0.92    | 67 (82.7)                        | 69 (83.1)   | 0.94    |
| <b>n (%)</b>      | <b>Remitted</b>     | 24 (29.6)                     | 24 (28.9)   |         | 14 (17.3)                        | 14 (16.9)   |         |
|                   | <b>Total</b>        | 81 (49.4)                     | 83 (50.6)   |         | 81 (49.4)                        | 83 (50.6)   |         |
| <b>HRSD17 ≤ 8</b> | <b>Not Remitted</b> | 48 (59.3)                     | 53 (63.9)   | 0.55    | 63 (77.8)                        | 68 (81.9)   | 0.51    |
| <b>n (%)</b>      | <b>Remitted</b>     | 33 (40.7)                     | 30 (36.1)   |         | 18 (22.2)                        | 15 (18.1)   |         |
|                   | <b>Total</b>        | 81 (49.4)                     | 83 (50.6)   |         | 81 (49.4)                        | 83 (50.6)   |         |
| <b>MADRS ≤ 9</b>  | <b>Not Remitted</b> | 48 (59.3)                     | 47 (56.6)   | 0.73    | 59 (72.8)                        | 61 (73.5)   | 0.92    |
| <b>n (%)</b>      | <b>Remitted</b>     | 33 (40.7)                     | 36 (43.4)   |         | 22 (27.2)                        | 22 (26.5)   |         |
|                   | <b>Total</b>        | 81 (49.4)                     | 83 (50.6)   |         | 81 (49.4)                        | 83 (50.6)   |         |
| <b>BDI ≤ 9</b>    | <b>Not Remitted</b> | 56 (69.1)                     | 56 (67.5)   | 0.82    | 61 (75.3)                        | 64 (77.1)   | 0.79    |
| <b>n (%)</b>      | <b>Remitted</b>     | 25 (30.9)                     | 27 (32.5)   |         | 20 (24.7)                        | 19 (22.9)   |         |
|                   | <b>Total</b>        | 81 (49.4)                     | 83 (50.6)   |         | 81 (49.4)                        | 83 (50.6)   |         |

Note. Remission rates were calculated based on 164 randomized participants. If a score was missing, the participant was considered as not remitted  
 HRSD17 ≤ 7: 17 Item Hamilton Rating Scale for Depression less than or equal to 7

HRSD17  $\leq$  8: 17 Item Hamilton Rating Scale for Depression less than or equal to 8  
MADRS  $\leq$  9: Montgomery-Asberg Depression Rating Scale less than or equal to 9  
BDI  $\leq$  9: Beck Depression Inventory less than or equal to 9



**eTable 5: Effect of rTMS Treatment by Gender**

| Outcome      | Results      | Male             |                |                | Female           |                |                | Total<br>(n=164) | Mantel-H<br>aenszel<br>P value |
|--------------|--------------|------------------|----------------|----------------|------------------|----------------|----------------|------------------|--------------------------------|
|              |              | Active<br>(n=67) | Sham<br>(n=65) | P<br>Valu<br>e | Active<br>(n=14) | Sham<br>(n=18) | P<br>Valu<br>e |                  |                                |
| HRSD 24 ≤ 7  | Not Remitted | 54 (80.6)        | 51<br>(78.5)   | 0.76           | 11 (78.6)        | 14<br>(77.8)   | 0.96           | 130 (79.3)       | 0.77                           |
|              | Remitted     | 13 (19.4)        | 14<br>(21.5)   |                | 3 (21.4)         | 4 (22.2)       |                | 34 (20.7)        |                                |
|              | <b>Total</b> | 67 (40.9)        | 65<br>(39.6)   |                | 14 (8.5)         | 18<br>(11.0)   |                | 164<br>(100.0)   |                                |
| HRSD 24 ≤ 8  | Not Remitted | 52 (77.6)        | 49<br>(75.4)   | 0.76           | 9 (64.3)         | 11<br>(61.1)   | 0.85           | 121 (73.8)       | 0.73                           |
|              | Remitted     | 15 (22.4)        | 16<br>(24.6)   |                | 5 (35.7)         | 7 (38.9)       |                | 43 (26.2)        |                                |
|              | <b>Total</b> | 67 (40.9)        | 65<br>(39.6)   |                | 14 (8.5)         | 18<br>(11.0)   |                | 164<br>(100.0)   |                                |
| HRSD 24 ≤ 10 | Not Remitted | 42 (62.7)        | 44<br>(67.7)   | 0.55           | 6 (42.9)         | 8 (44.4)       | 0.93           | 100 (61.0)       | 0.57                           |
|              | Remitted     | 25 (37.3)        | 21<br>(32.3)   |                | 8 (57.1)         | 10<br>(55.6)   |                | 64 (39.0)        |                                |
|              | <b>Total</b> | 67 (40.9)        | 65<br>(39.6)   |                | 14 (8.5)         | 18<br>(11.0)   |                | 164<br>(100.0)   |                                |

Note. Remission rates were calculated based on 164 randomized participants. If a score was missing, the participant was considered as not remitted.

HRSD24 ≤ 7: 24 Item Hamilton Rating Scale for Depression less than or equal to 7

HRSD24 ≤ 8: 24 Item Hamilton Rating Scale for Depression less than or equal to 8

HRSD24 ≤ 10: 24 Item Hamilton Rating Scale for Depression less than or equal to 10

**eTable 6: Effect of rTMS Treatment on Secondary Outcomes (Intention to Treat) by PTSD Status, End of rTMS Treatment**

| Outcome           | Results             | PTSD          |             | P Value | No PTSD       |             | P Value |
|-------------------|---------------------|---------------|-------------|---------|---------------|-------------|---------|
|                   |                     | Active (n=40) | Sham (n=41) |         | Active (n=41) | Sham (n=42) |         |
| <b>HRSD17 ≤ 7</b> | <b>Not Remitted</b> | 31 (77.5)     | 32 (78.0)   | 0.95    | 26 (63.4)     | 27 (64.3)   | 0.93    |
| <b>n (%)</b>      | <b>Remitted</b>     | 9 (22.5)      | 9 (22.0)    |         | 15 (36.6)     | 15 (35.7)   |         |
|                   | <b>Total</b>        | 40 (24.4)     | 41 (25.0)   |         | 41 (25.0)     | 42 (25.6)   |         |
| <b>HRSD17 ≤ 8</b> | <b>Not Remitted</b> | 26 (65.0)     | 29 (70.7)   | 0.58    | 22 (53.7)     | 24 (57.1)   | 0.75    |
| <b>n (%)</b>      | <b>Remitted</b>     | 14 (35.0)     | 12 (29.3)   |         | 19 (46.3)     | 18 (42.9)   |         |
|                   | <b>Total</b>        | 40 (24.4)     | 41 (25.0)   |         | 41 (25.0)     | 42 (25.6)   |         |
| <b>MADRS ≤ 9</b>  | <b>Not Remitted</b> | 27 (67.5)     | 23 (56.1)   | 0.29    | 21 (51.2)     | 24 (57.1)   | 0.59    |
| <b>n (%)</b>      | <b>Remitted</b>     | 13 (32.5)     | 18 (43.9)   |         | 20 (48.8)     | 18 (42.9)   |         |
|                   | <b>Total</b>        | 40 (24.4)     | 41 (25.0)   |         | 41 (25.0)     | 42 (25.6)   |         |
| <b>BDI ≤ 9</b>    | <b>Not Remitted</b> | 30 (75.0)     | 28 (68.3)   | 0.50    | 26 (63.4)     | 28 (66.7)   | 0.76    |
| <b>n (%)</b>      | <b>Remitted</b>     | 10 (25.0)     | 13 (31.7)   |         | 15 (36.6)     | 14 (33.3)   |         |
|                   | <b>Total</b>        | 40 (24.4)     | 41 (25.0)   |         | 41 (25.0)     | 42 (25.6)   |         |

Note. Remission rates were calculated based on 164 randomized participants. If a score was missing, the participant was considered as not remitted.

HRSD17  $\leq$  7: 17 Item Hamilton Rating Scale for Depression less than or equal to 7  
HRSD17  $\leq$  8: 17 Item Hamilton Rating Scale for Depression less than or equal to 8  
MADRS  $\leq$  9: Montgomery-Asberg Depression Rating Scale less than or equal to 9  
BDI  $\leq$  9: Beck Depression Inventory less than or equal to 9  
QIDS  $\leq$  5: Quick Inventory of Depressive Symptomatology less than or equal to 5

**eTable 7: Effect of rTMS Treatment on Secondary Outcomes (Intention to Treat) by PTSD Status, End of 24-Week Follow-Up**

|                   |                     | PTSD          |             |         | No PTSD       |             |         |
|-------------------|---------------------|---------------|-------------|---------|---------------|-------------|---------|
| Outcome           | Results             | Active (n=40) | Sham (n=41) | P Value | Active (n=41) | Sham (n=42) | P Value |
| <b>HRSD17 ≤ 7</b> | <b>Not Remitted</b> | 38 (95.0)     | 38 (92.7)   | 0.66    | 29 (70.7)     | 31 (73.8)   | 0.75    |
| <b>n (%)</b>      | <b>Remitted</b>     | 2 (5.0)       | 3 (7.3)     |         | 12 (29.3)     | 11 (26.2)   |         |
|                   | <b>Total</b>        | 40 (24.4)     | 41 (25.0)   |         | 41 (25.0)     | 42 (25.6)   |         |
| <b>HRSD17 ≤ 8</b> | <b>Not Remitted</b> | 37 (92.5)     | 38 (92.7)   | 0.97    | 26 (63.4)     | 30 (71.4)   | 0.44    |
| <b>n (%)</b>      | <b>Remitted</b>     | 3 (7.5)       | 3 (7.3)     |         | 15 (36.6)     | 12 (28.6)   |         |
|                   | <b>Total</b>        | 40 (24.4)     | 41 (25.0)   |         | 41 (25.0)     | 42 (25.6)   |         |
| <b>MADRS ≤ 9</b>  | <b>Not Remitted</b> | 35 (87.5)     | 35 (85.4)   | 0.78    | 24 (58.5)     | 26 (61.9)   | 0.75    |
| <b>n (%)</b>      | <b>Remitted</b>     | 5 (12.5)      | 6 (14.6)    |         | 17 (41.5)     | 16 (38.1)   |         |
|                   | <b>Total</b>        | 40 (24.4)     | 41 (25.0)   |         | 41 (25.0)     | 42 (25.6)   |         |
| <b>BDI ≤ 9</b>    | <b>Not Remitted</b> | 33 (82.5)     | 33 (80.5)   | 0.82    | 28 (68.3)     | 31 (73.8)   | 0.58    |
| <b>n (%)</b>      | <b>Remitted</b>     | 7 (17.5)      | 8 (19.5)    |         | 13 (31.7)     | 11 (26.2)   |         |
|                   | <b>Total</b>        | 40 (24.4)     | 41 (25.0)   |         | 41 (25.0)     | 42 (25.6)   |         |

Note. Remission rates were calculated based on 164 randomized participants. If a score was missing, the participant was considered as not remitted.

HRSD17  $\leq$  7: 17 Item Hamilton Rating Scale for Depression less than or equal to 7  
HRSD17  $\leq$  8: 17 Item Hamilton Rating Scale for Depression less than or equal to 8  
MADRS  $\leq$  9: Montgomery-Asberg Depression Rating Scale less than or equal to 9  
BDI  $\leq$  9: Beck Depression Inventory less than or equal to 9
